# Supplementary material for: Prevalence of COVID-19: A Look behind the Scenes
Source: Preprints.org preprint supplement (doi:10.20944/preprints202004.0179.v2), 2020-04-15

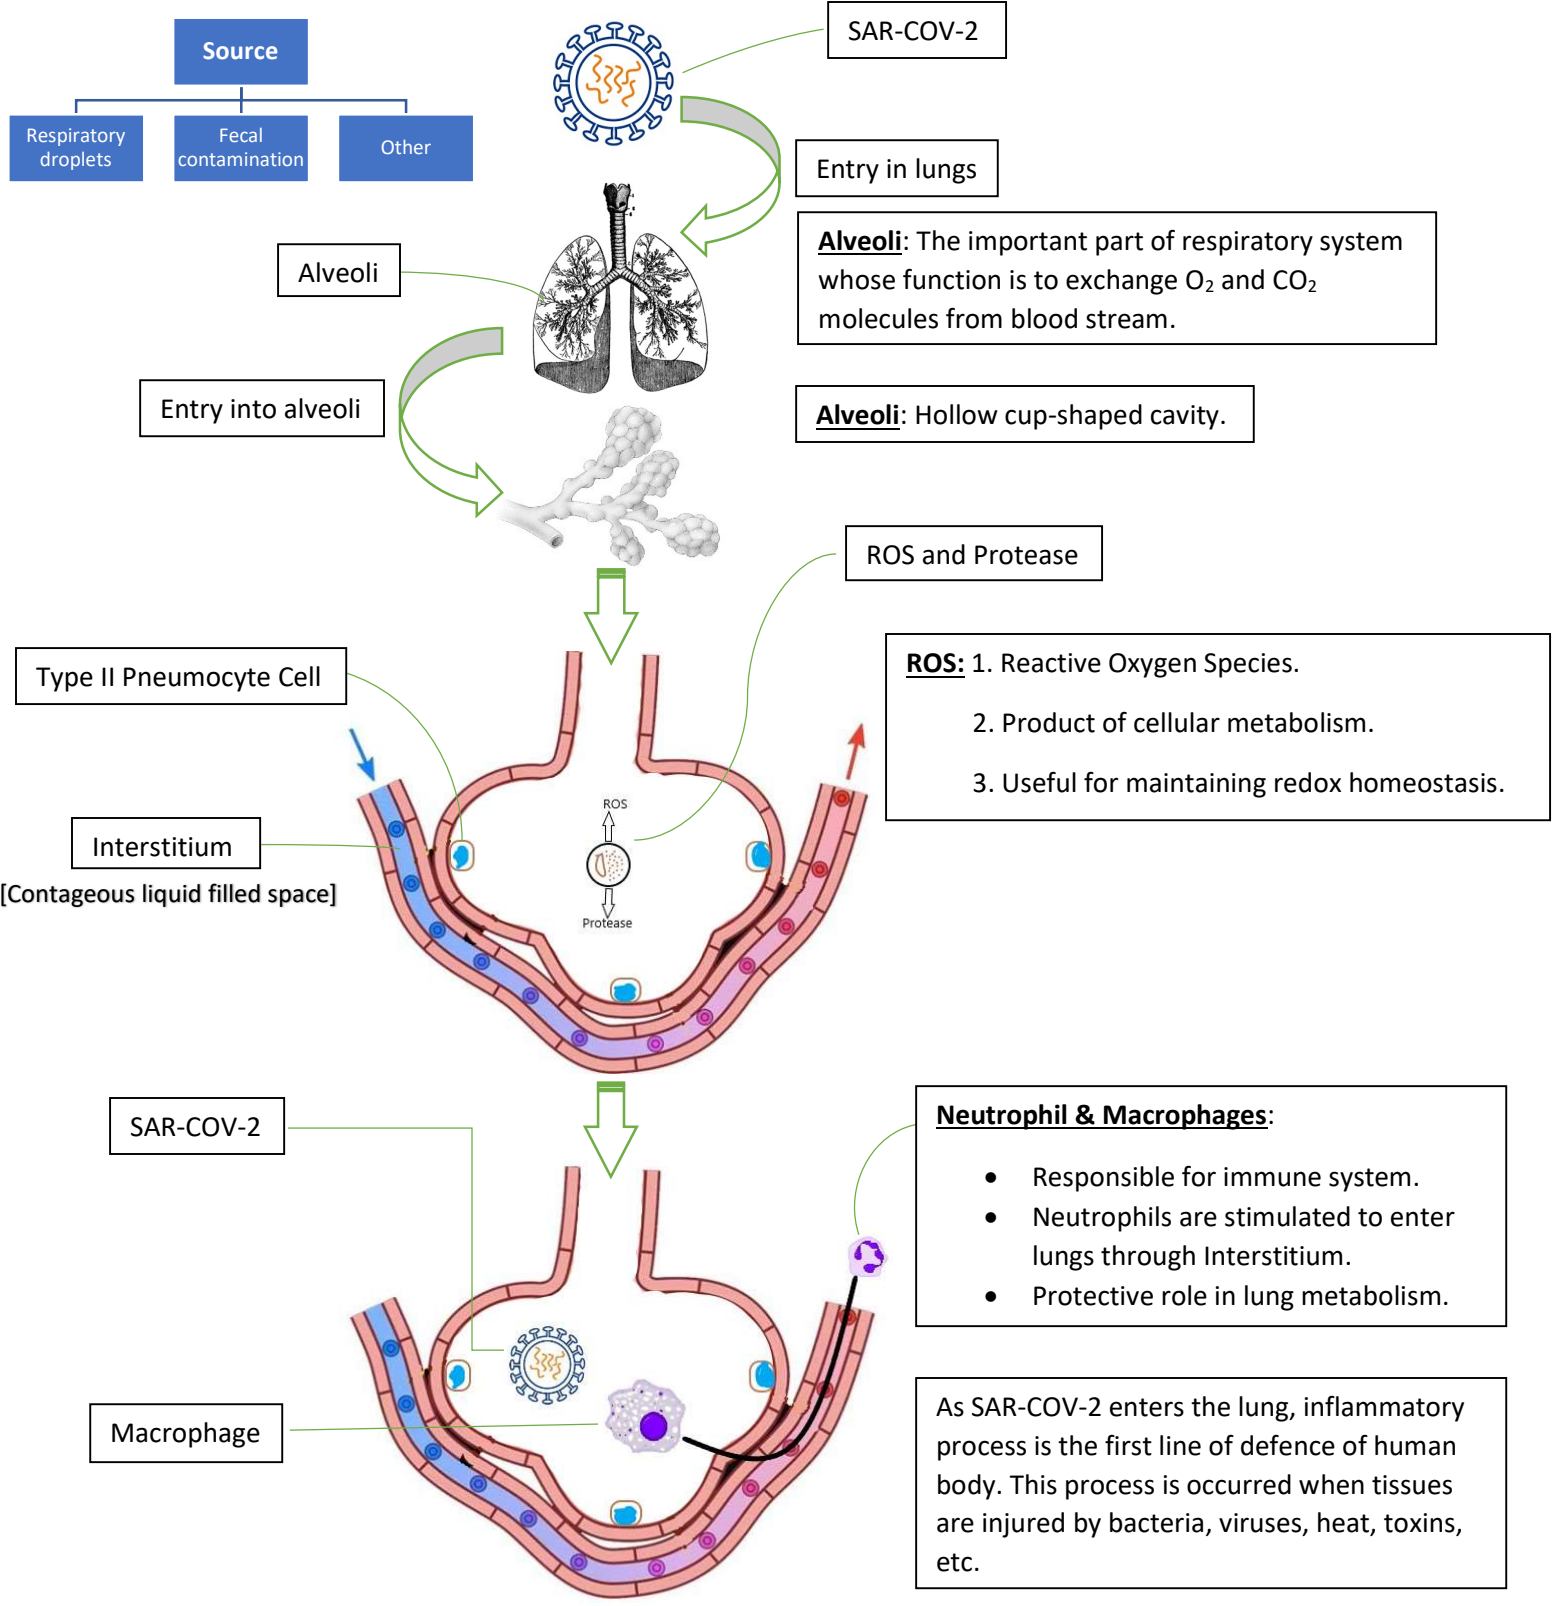

These damaged cells release chemicals. These chemicals cause blood vessels to leak fluid into tissue causing swelling.

As fluid leaks into tissue, it causes:

- **Vasodilation:** Due to smooth muscles in the vessel wall, widening of the vessel takes place called 'Vasodilation'.
- **Increase in vascular permeability:** There is a balance between fluid leaving and re-entering. Inflammation shifts this balance.

In inflammatory response.

[Parts]

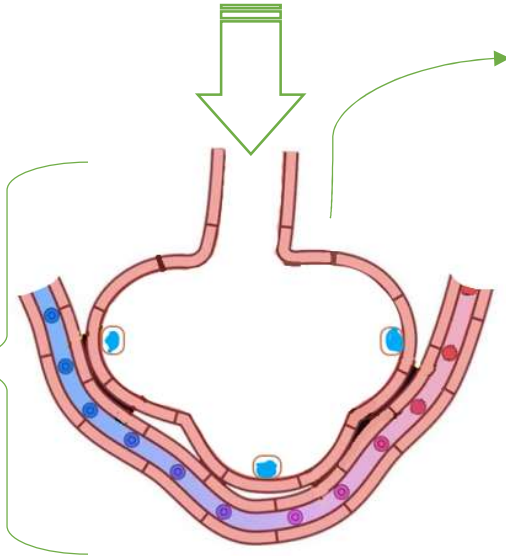

In alveolar edema, due to fluid accumulation, there is increased work of breathing.

Leads to

Difficulty in breathing

Alveolar Edema

Vasodilation and increased vascular permeability results in the fluid build up in alveolar spaces. This is called as 'Alveolar edema'.

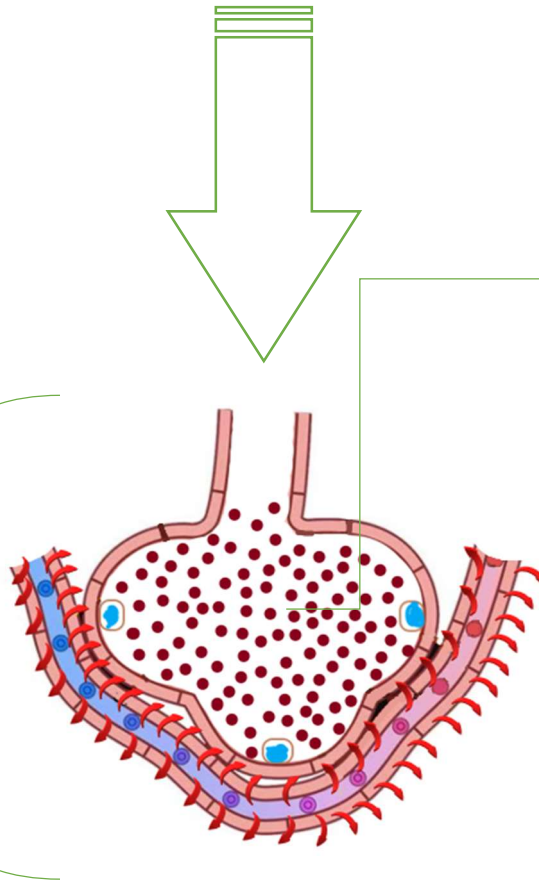

# SIRS

In some cases, an inflammatory state affecting the whole body called '**Systemic Inflammatory Response Syndrome**' occurs. It is the inflammatory response.

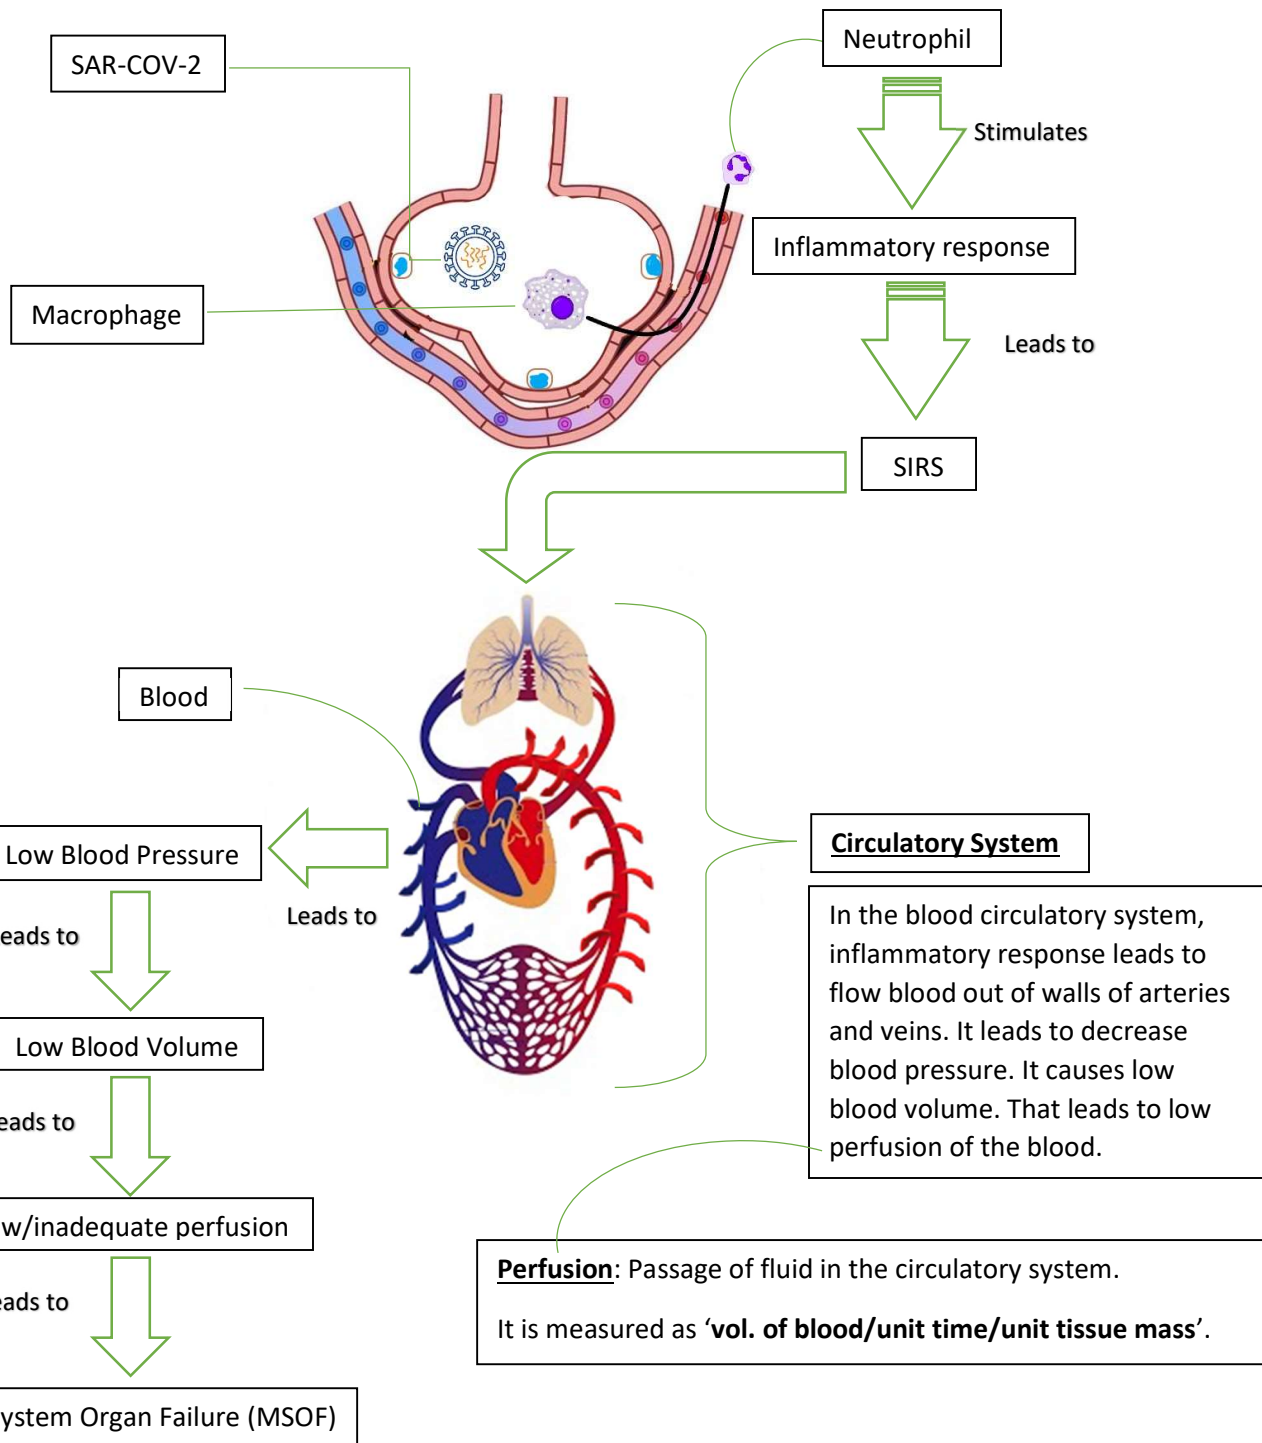

Supplement: Supplementary file 1 [file supplementary]
